# Supplementary material
Source: PubMed Central journal article supplement (PMC3880056)
Supplement: ac403057y_si_001.pdf [file ac403057y_si_001.pdf]

Supporting Information for

# Analyzing Protein Micro-Heterogeneity in Chicken Ovalbumin by High-Resolution Native Mass Spectrometry Exposes Qualitatively and Semi- Quantitatively 59 Proteoforms

*Yang Yang<sup>1,2</sup>, Arjan Barendregt<sup>1,2</sup>, Jhannis P. Kamerling<sup>1</sup> and Albert J.R. Heck<sup>1,2\*</sup>*

<sup>1</sup> Biomolecular Mass Spectrometry and Proteomics, Bijvoet Center for Biomolecular Research  
and Utrecht Institute for Pharmaceutical Sciences, University of Utrecht, Padualaan 8, 3584 CH  
Utrecht, The Netherlands

<sup>2</sup> Netherlands Proteomics Center, Padualaan 8, 3584 CH Utrecht, The Netherlands

Author for Correspondence: Albert Heck, [a.j.r.heck@uu.nl](mailto:a.j.r.heck@uu.nl)

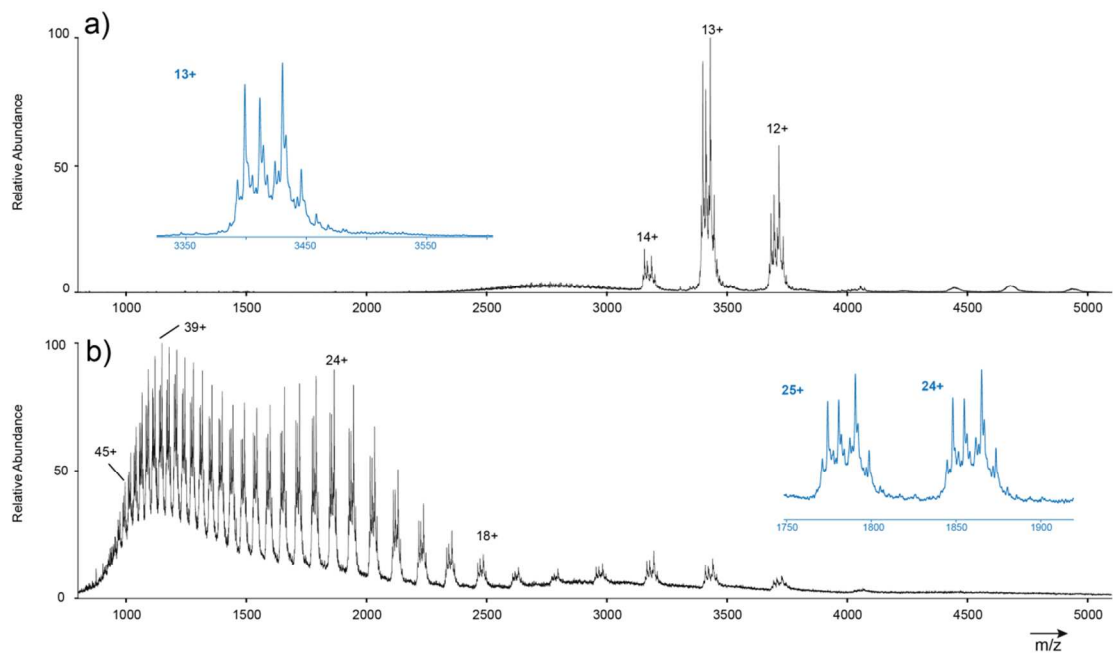

**Supporting Information Figure S-1:** **a)** Native ESI-MS spectrum of the unprocessed ovalbumin acquired on a modified ESI-TOF instrument (LCT, Waters, Manchester, UK). Ovalbumin was sprayed from 150 mM aqueous ammonium acetate at pH 7.5. The following parameters are used: Capillary voltage 1300 V; sampling cone 50 V; source backing pressure 7.2 mbar. **b)** Denatured ESI-MS spectrum of the unprocessed ovalbumin acquired on a modified ESI-TOF instrument (LCT, Waters, Manchester, UK). Ovalbumin was sprayed from a water-acetonitrile mixture (1:1 ratio) containing 0.2% formic acid. The following parameters are used: Capillary voltage 1300 V; sampling cone 50 V; source backing pressure 7.2 mbar.

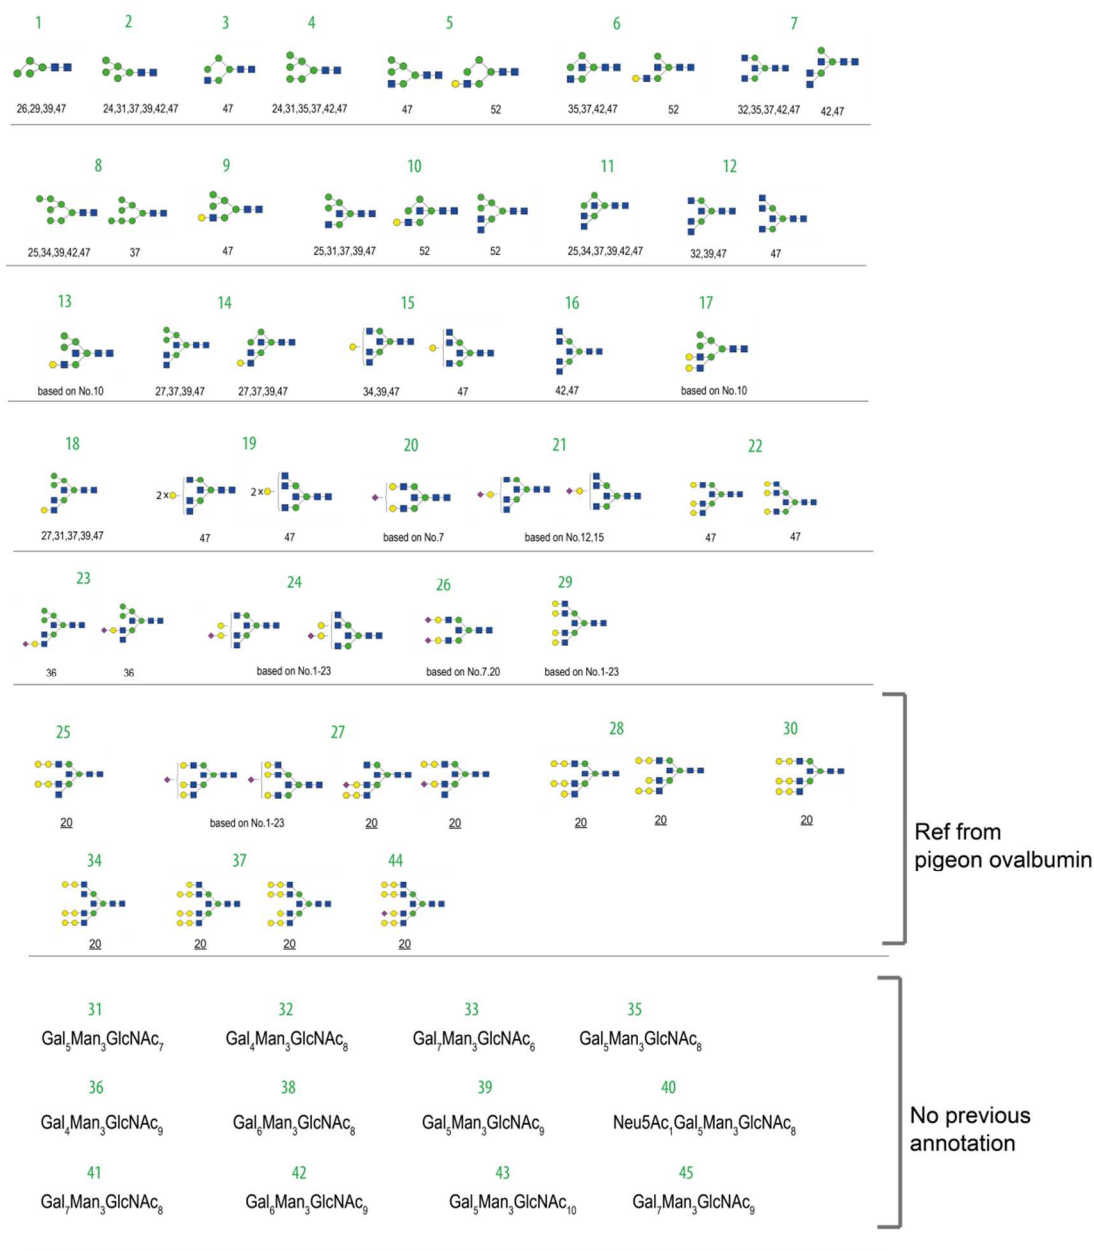

**Supporting Information Figure S-2:** Survey of assigned N-glycans of chicken ovalbumin based on earlier literature reports (references are shown below the structures) and according to known biosynthetic pathways. Underlined references are from pigeon ovalbumin. For non-assigned structures only bruttoformula are given, as explained in the text.

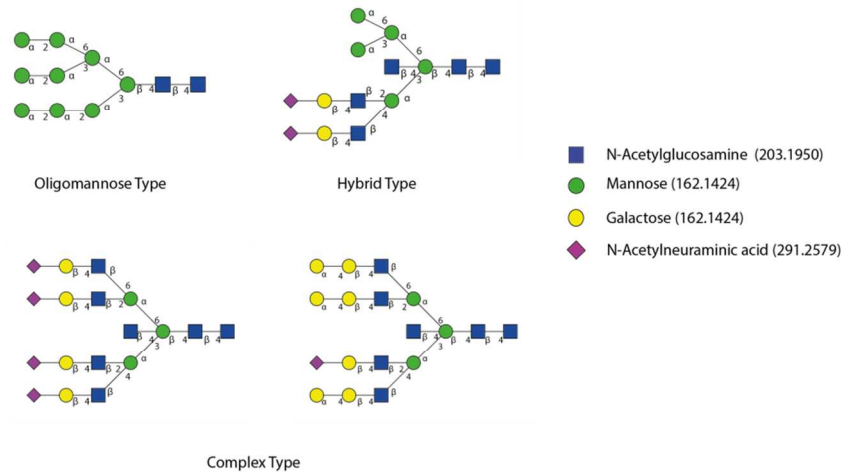

**Supporting Information Figure S-3:** Annotation of N-glycan structures and linkages used in this study.

36 Gal<sub>4</sub>Man<sub>3</sub>GlcNAc<sub>9</sub>

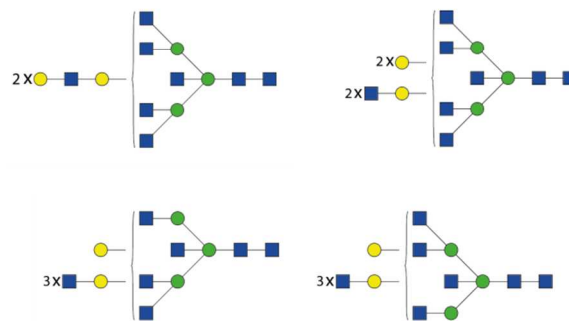

**Supporting Information Figure S-4:** Several hypothetical glycan structures for proteoform 36, i.e. tri- and tetra-antennae with insecting GlcNAc and extensions with polylactosamine (Gal(β1-4)GlcNAc) type units, single Gal residues or Gal(α1-4)Gal epitopes.
